# Supplementary material for: ABCG2 is a potential prognostic marker of overall survival in patients with clear cell renal cell carcinoma
Source: Springer Nature journal article supplement (doi:10.1186/s12885-017-3224-6), 2017-03-27

Supplemental figure 1

ABCG2 Expression RNA-seq

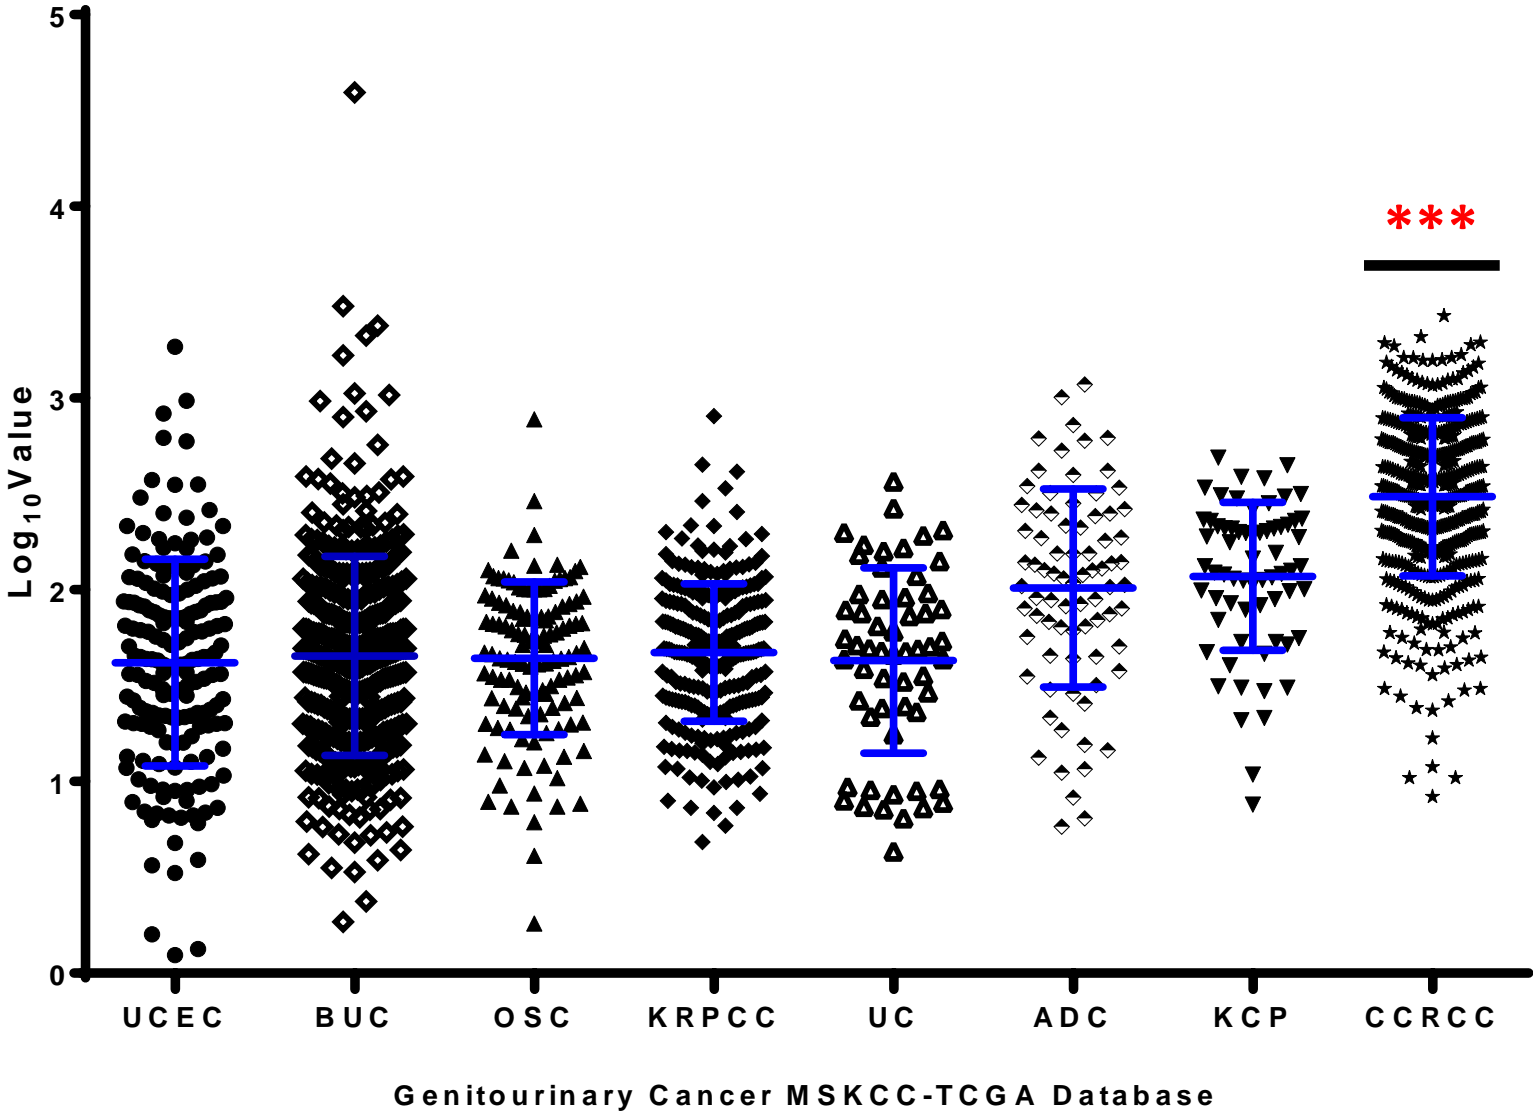

Supplement: MOESM1 [file 12179982]
